# Supplementary material for: Breast Cancer Index and Prediction of Extended Aromatase Inhibitor Therapy Benefit in Hormone Receptor-Positive Breast Cancer from the NRG Oncology/NSABP B-42 Trial
Source: PubMed Central journal article supplement — Clin Cancer Res. 2024 Feb 20;30(9):1984–91. doi: 10.1158/1078-0432.CCR-23-1977 (PMC11061597; doi:10.1158/1078-0432.ccr-23-1977), 2024-02-20
Supplement: ccr-23-1977_supplementary_figure_s1_suppfs1.pdf [file ccr-23-1977_supplementary_figure_s1_suppfs1.pdf]

Mamounas, et al: Breast Cancer Index and Prediction of Benefit from Extended Aromatase Inhibitor Therapy in Hormone Receptor-Positive Breast Cancer: NRG Oncology/NSABP B-42

Supplementary Fig. S1.

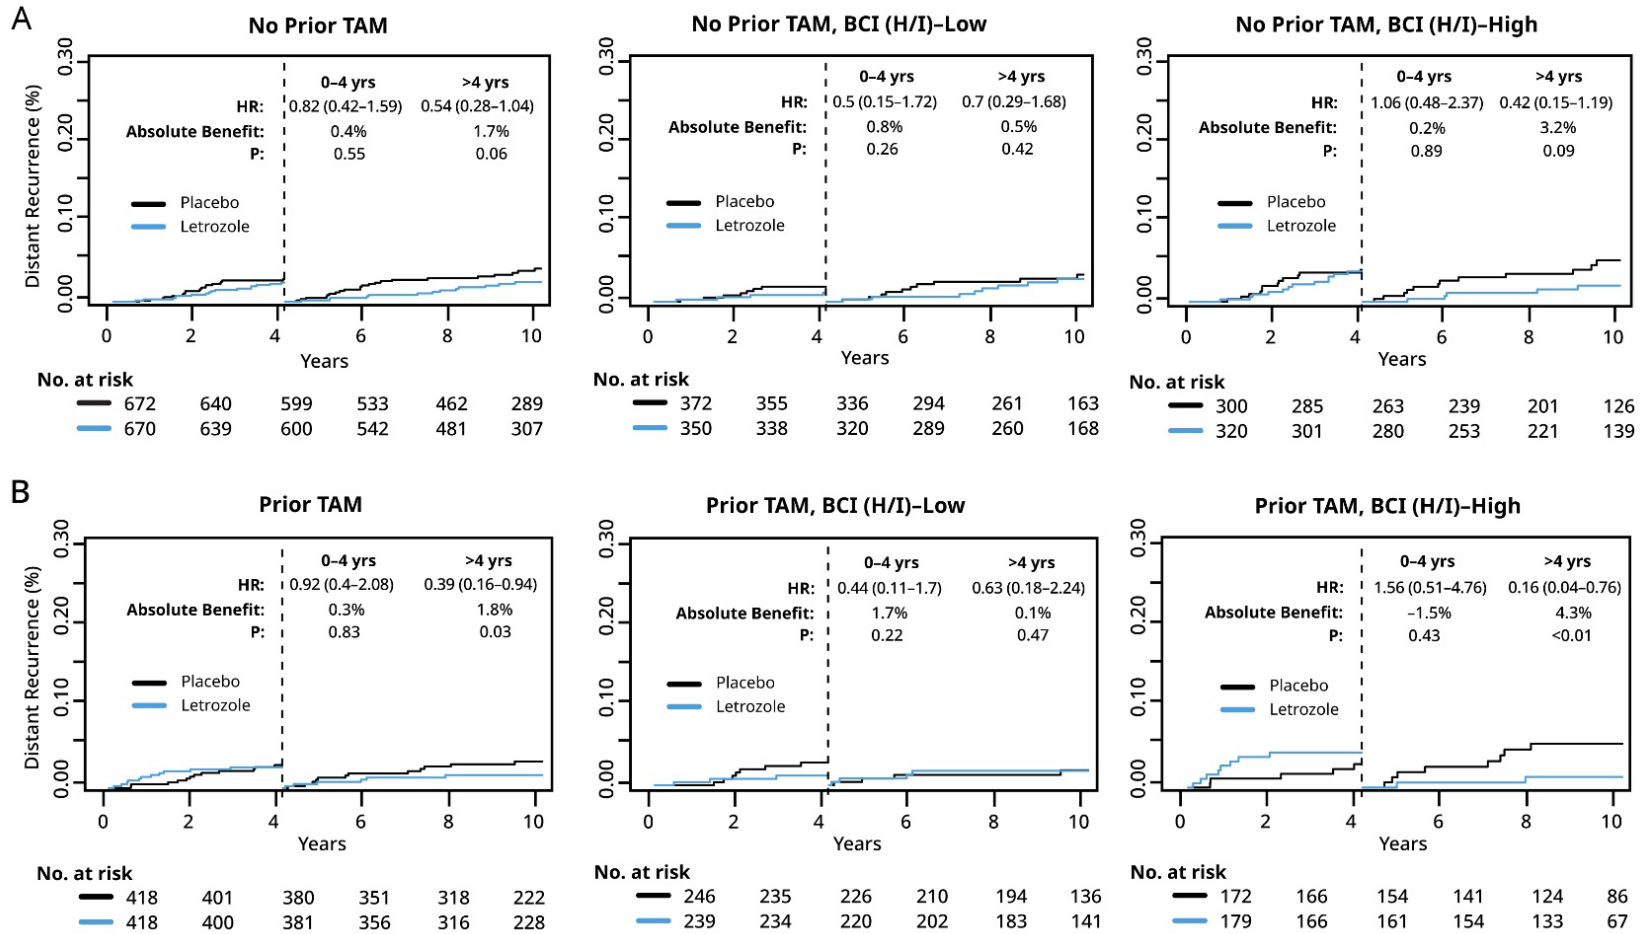

**Supplementary Fig. S1.** Time-dependent Kaplan-Meier analysis based on Distant Recurrence comparing extended letrozole vs placebo in subsets of patients treated with initial adjuvant endocrine therapy with either **A**, AI only or **B**, a sequence of tamoxifen followed by AI in the overall Breast Cancer Index (BCI) NSABP B-42 translational cohort.
